# Supplementary material
Source: PubMed Central journal article supplement (PMC2698350)
Supplement: supp_75_12_4111__1.pdf [file supp_75_12_4111__1.pdf]

a

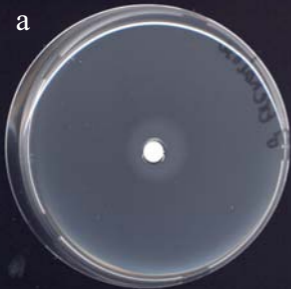

b

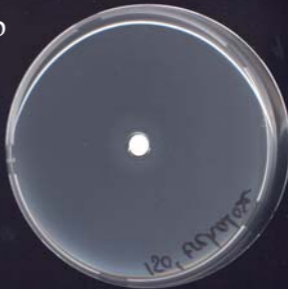

**Figure S1.** Chemotaxis of *B. cereus* ATCC 14579 cells to the attractant trehalose when cells were not exposed to salt (a), and after exposure to 5% salt for 150 min (b). Images of the chemotaxis plates were taken after 3 h of incubation.
